# Supplementary material for: Nano-Topographical Control of Ti-Nb-Zr Alloy Surfaces for Enhanced Osteoblastic Response
Source: MDPI journal article supplement (doi:10.3390/nano11061507), 2021-06-07
Supplement: s1 [file s1]

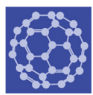

## Communication

# Nano-Topographical Control of Ti-Nb-Zr Alloy Surfaces for Enhanced Osteoblastic Response

Min-Kyu Lee <sup>1,2</sup>, Hyun Lee <sup>3,4</sup>, Hyoun-Ee Kim <sup>1</sup>, Eun-Jung Lee <sup>5</sup>, Tae-Sik Jang <sup>6,\*</sup> and Hyun-Do Jung <sup>3,4,\*</sup>

<sup>1</sup> Department of Materials Science and Engineering, Seoul National University, Seoul 08826, Korea; elzkdnm@snu.ac.kr (M.-K.L.); kimhe@snu.ac.kr (H.-E.K.)

<sup>2</sup> Department of Materials Science and Engineering and Querrey-Simpson Institute for Bioelectronics, Northwestern University, Evanston, IL 60208, USA

<sup>3</sup> Department of Biomedical-Chemical Engineering, Catholic University of Korea, Bucheon14662, Korea; leeh0520@catholic.ac.kr

<sup>4</sup> Department of Biotechnology, The Catholic University of Korea, Bucheon 14662, Korea

<sup>5</sup> Department of Nano-Biomedical Science & BK21 PLUS NBM Global Research Center for Regenerative Medicine, Dankook University, Cheonan 31116, Korea; ejlee79@dankook.ac.kr

<sup>6</sup> Department of Materials Science and Engineering, Chosun University, Gwangju 61452, Korea

\* Correspondence: tsjang@chosun.ac.kr (T.-S.J.); hdjung@catholic.ac.kr (H.-D.J.)

**Citation:** Lee, M.-K.; Lee, H.; Kim, H.-E.; Lee, E.-J.; Jang, T.-S.; Jung, H.-D. Nano-Topographical Control of Ti-Nb-Zr Alloy Surfaces for Enhanced Osteoblastic Response. *Nanomaterials* **2021**, *11*, 1507. <https://doi.org/10.3390/nano11061507>

Academic Editors: Hicham Fenniri and Junghwan Lee

Received: 24 April 2021

Accepted: 2 June 2021

Published: 7 June 2021

**Publisher's Note:** MDPI stays neutral with regard to jurisdictional claims in published maps and institutional affiliations.

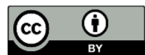

**Copyright:** © 2021 by the authors. Licensee MDPI, Basel, Switzerland. This article is an open access article distributed under the terms and conditions of the Creative Commons Attribution (CC BY) license (<http://creativecommons.org/licenses/by/4.0/>).

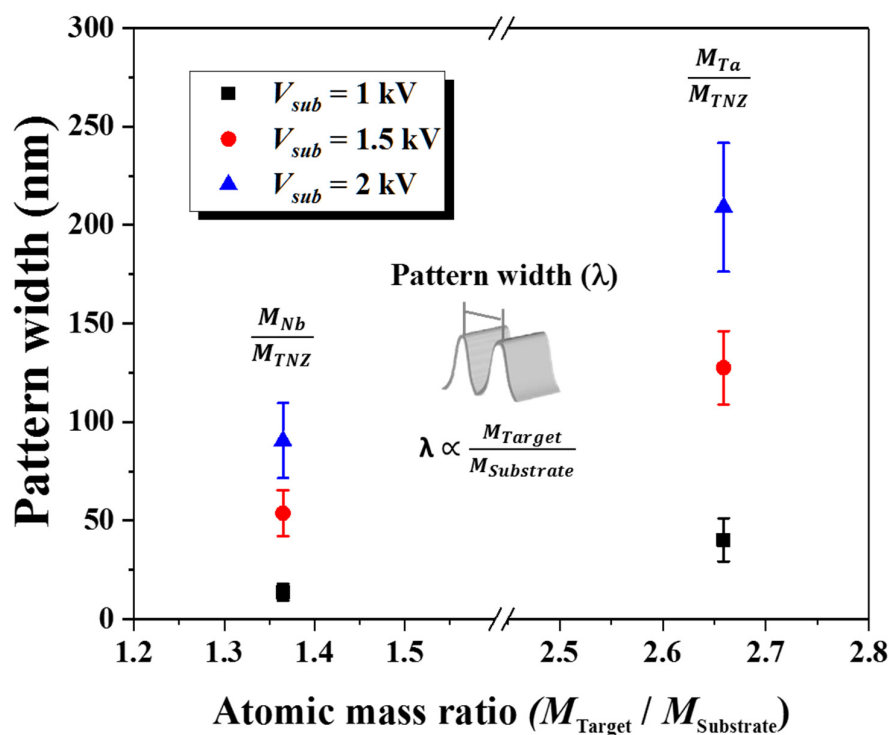

**Figure S1.** The width of nano-patterns formed on TNZ substrate as a function of atomic mass ratio between target and substrate materials.

A

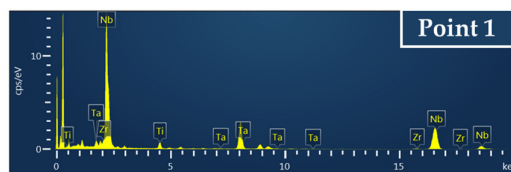

| Element | Line Type | k Factor | k Factor type | Absorption Correction | Wt%    | Wt% Sigma | Atomic % |
|---------|-----------|----------|---------------|-----------------------|--------|-----------|----------|
| Ti      | K series  | 1.090    |               | 1.00                  | 5.97   | 0.16      | 11.28    |
| Zr      | K series  | 3.211    |               | 1.00                  | 1.91   | 0.22      | 1.90     |
| Nb      | K series  | 3.717    |               | 1.00                  | 86.17  | 0.48      | 83.86    |
| Ta      | L series  | 2.135    |               | 1.00                  | 5.95   | 0.43      | 2.97     |
| Total:  |           |          |               |                       | 100.00 |           | 100.00   |

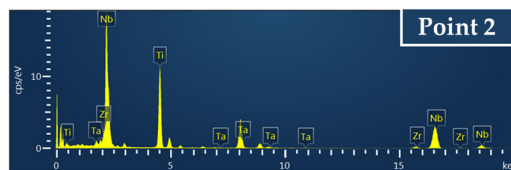

| Element | Line Type | k Factor | k Factor type | Absorption Correction | Wt%    | Wt% Sigma | Atomic % |
|---------|-----------|----------|---------------|-----------------------|--------|-----------|----------|
| Ti      | K series  | 1.090    |               | 1.00                  | 31.90  | 0.35      | 48.11    |
| Zr      | K series  | 3.211    |               | 1.00                  | 3.54   | 0.22      | 2.80     |
| Nb      | K series  | 3.717    |               | 1.00                  | 61.64  | 0.44      | 47.92    |
| Ta      | L series  | 2.135    |               | 1.00                  | 2.92   | 0.35      | 1.17     |
| Total:  |           |          |               |                       | 100.00 |           | 100.00   |

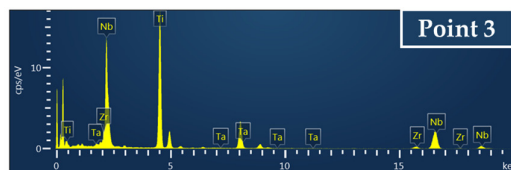

| Element | Line Type | k Factor | k Factor type | Absorption Correction | Wt%    | Wt% Sigma | Atomic % |
|---------|-----------|----------|---------------|-----------------------|--------|-----------|----------|
| Ti      | K series  | 1.090    |               | 1.00                  | 49.71  | 0.43      | 65.94    |
| Zr      | K series  | 3.211    |               | 1.00                  | 4.02   | 0.23      | 2.80     |
| Nb      | K series  | 3.717    |               | 1.00                  | 45.12  | 0.44      | 30.86    |
| Ta      | L series  | 2.135    |               | 1.00                  | 1.15   | 0.31      | 0.40     |
| Total:  |           |          |               |                       | 100.00 |           | 100.00   |

B

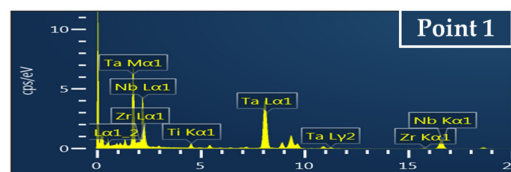

| Element | Line Type | k Factor | k Factor type | Absorption Correction | Wt%    | Wt% Sigma | Atomic % |
|---------|-----------|----------|---------------|-----------------------|--------|-----------|----------|
| Ti      | K series  | 1.090    |               | 1.00                  | 2.22   | 0.07      | 6.14     |
| Zr      | K series  | 3.211    |               | 1.00                  | 1.09   | 0.12      | 1.58     |
| Nb      | K series  | 3.717    |               | 1.00                  | 31.07  | 0.34      | 44.27    |
| Ta      | L series  | 2.135    |               | 1.00                  | 65.61  | 0.35      | 48.00    |
| Total:  |           |          |               |                       | 100.00 |           | 100.00   |

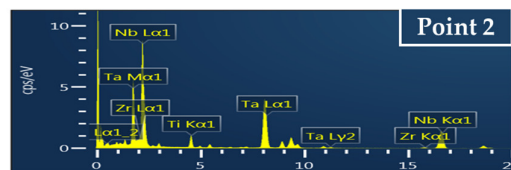

| Element | Line Type | k Factor | k Factor type | Absorption Correction | Wt%    | Wt% Sigma | Atomic % |
|---------|-----------|----------|---------------|-----------------------|--------|-----------|----------|
| Ti      | K series  | 1.090    |               | 1.00                  | 4.90   | 0.09      | 11.33    |
| Zr      | K series  | 3.211    |               | 1.00                  | 1.67   | 0.13      | 2.02     |
| Nb      | K series  | 3.717    |               | 1.00                  | 50.87  | 0.35      | 60.61    |
| Ta      | L series  | 2.135    |               | 1.00                  | 42.56  | 0.35      | 26.04    |
| Total:  |           |          |               |                       | 100.00 |           | 100.00   |

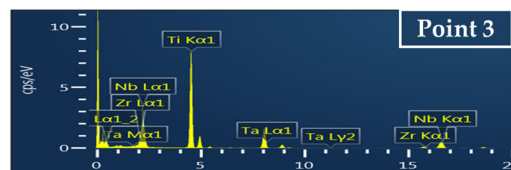

| Element | Line Type | k Factor | k Factor type | Absorption Correction | Wt%    | Wt% Sigma | Atomic % |
|---------|-----------|----------|---------------|-----------------------|--------|-----------|----------|
| Ti      | K series  | 1.090    |               | 1.00                  | 62.34  | 0.29      | 76.66    |
| Zr      | K series  | 3.211    |               | 1.00                  | 5.34   | 0.15      | 3.45     |
| Nb      | K series  | 3.717    |               | 1.00                  | 30.37  | 0.27      | 19.26    |
| Ta      | L series  | 2.135    |               | 1.00                  | 1.95   | 0.19      | 0.63     |
| Total:  |           |          |               |                       | 100.00 |           | 100.00   |

Figure S2. EDS point analysis spectra of (A) Nb- and (B) Ta-TIPS TNZ.
